# Supplementary material
Source: ML conference proceedings conference paper supplement (https://proceedings.mlr.press/v119/yehuda20a.html)
Supplement: Supplementary file [file yehuda20a-supp.pdf]

---

# It's Not What Machines Can Learn, It's What We Cannot Teach

## Supplemental Material

---

Gal Yehuda Moshe Gabel Assaf Schuster

### Proof of Lemma 5.

**Lemma 5.** *There exists an NP-hard language  $L_1$  and a function  $\delta(n) \rightarrow 0$  as  $n \rightarrow \infty$ , such that for any sufficiently long  $w$  generated by any randomized polynomial process,*

$$\Pr[w \in L_1] \leq \delta(n).$$

The proof is similar to the proof of Theorem 1 in (Itsykson et al., 2016). The main difference is that we construct a decidable language, in contrast to the language generated in (Itsykson et al., 2016).

*Proof.* For every  $n$ , the output of a randomized algorithm  $P$  is a random variable  $P_n$ : for  $w \in \{0, 1\}^n$ ,  $\Pr[P_n = w]$  is the probability that given the length  $n$ ,  $P$  outputs  $w$ . Let  $K \subseteq \{0, 1\}^n$  be a set of words of length  $n$ ;  $\Pr[P_n \in K]$  is the probability that a random word  $w$  drawn by  $P_n$  is in  $K$ .

Given two random variables  $X, Y$  such that  $X, Y$  take values in  $\{0, 1\}^n$ , the *statistical distance* between  $X$  and  $Y$  is defined as (Itsykson et al., 2016):

$$\Delta(X, Y) = \max_{K \subseteq \{0, 1\}^n} |P[X \in K] - P[Y \in K]|.$$

Using Theorem 9 in (Itsykson et al., 2016) when  $a = \frac{1}{2}$  and  $b = 1$  we obtain the following corollary.

**Corollary 6.** *For every randomized algorithm  $P$  that runs in time  $O(n^{\log^{0.5} n})$  there exist infinitely many words that  $P$  can only generate with probability less than  $\epsilon(n)$ , where  $\epsilon(n) \rightarrow 0$  as  $n \rightarrow \infty$ .*

We construct the randomized algorithm  $P$  as follows. Let  $\mathcal{M}$  be an enumeration of all probabilistic Turing machines  $\mathcal{M} = M_1, M_2, M_3, \dots$ , under a standard enumeration of Turing machines, and let  $g(n)$  be a function that satisfies  $g(n)\epsilon(n) \rightarrow 0$  and  $g(n) \rightarrow \infty$  (where  $\epsilon(n)$  is the function from Corollary 6). Example of such function is  $g(n) = \frac{1}{\log(\epsilon(n))}$ . We define  $\delta(n) = g(n)\epsilon(n)$ , by the definition of  $g(n)$ ,  $\delta(n) \rightarrow 0$ .

On input  $n$ , the algorithm  $P$  uniformly chooses  $M_i$  for  $1 \leq i \leq g(n)$  and runs  $M_i$  on the input  $n$  (with the random

bits  $M_i$  needs) for  $O(n^{\log^{0.5} n})$  steps. If  $M_i$  returned a word  $w < n$ ,  $P$  pads it with  $n - |w|$  zeros and returns the result. If  $M_i$  returned a word  $w > n$ ,  $P$  trims  $|w| - n$  characters from  $w$  and returns it. Finally, if  $M_i$  did not halt,  $P$  returns  $w = 1^n$ .

$P$  satisfies the following properties:

1. For every randomized polynomial algorithm  $P'$  and for every  $w \in \{0, 1\}^n$  when  $n$  is large enough,

$$\Pr[P_n = w] \geq \frac{1}{g(n)} \Pr[P'_n = w].$$

2.  $P$  runs in time  $O(n^{\log^{0.5} n})$ .

We show that the first property holds as follows. Let  $P'$  be a randomized polynomial algorithm that runs in time  $O(n^c)$ , and let  $n_0$  be the first index that  $P'$  appears in the enumeration  $\mathcal{M}$ . For  $w$ ,  $|w| = n \geq g(n_0)$  and  $n^{\log^{0.5} n} \geq n^c$ , the probability of  $P$  to generate  $w$  is at least the probability to choose the machine  $P'$ ,  $\frac{1}{g(n)}$ , multiplied by the probability that the machine  $P'$  generates  $w$ :  $\Pr[P'_n = w]$ . Note we give  $P'$  enough time to complete the computation by choosing  $n$  such that  $n^{\log^{0.5} n} \geq n^c$ .

The second property holds by the definition of  $P$ .

By Corollary 6 there exists a randomized algorithm  $P^*$  such that for infinitely many  $n$ 's  $n_1, n_2, n_3, \dots$ , it holds that  $\Delta(P_n^*, P_n) \geq 1 - \epsilon(n)$ . It means that for each such  $n$ , there exists a set of strings  $K_n$  such that  $\Pr[P_n \in K_n] \leq \epsilon(n)$ .

Define  $L_1$  as the union of all  $K_n$ .

Let  $w \in L_1$  of length  $n$  for sufficiently large  $n$ , and let  $P'$  be a randomized polynomial algorithm.

$$\Pr[w = P'_n] \leq g(n) \Pr[w = P_n] \tag{1}$$

$$\leq g(n)\epsilon(n) \tag{2}$$

$$= \delta(n) \rightarrow 0. \tag{3}$$

Where (1) follows from the first property of  $P$ , (2) follows from the definition of  $L$ , and (3) is the definition of  $\delta(n)$ .  $\square$

## Additional Details on CQC

For reproducibility, we include full details of our case study on Conjunctive Query Containment (CQC).

**Encoding Query Tokens** Table 1 shows the mapping between query tokens and their representation as one-hot vectors.

Table 1. Token representation. Each token with index  $j$  is mapped to a vector with 1 in position  $j$  and all other elements are zero. The dictionary size and the length of the vectors is  $d = 42$ .

| Type        | Tokens     | Index range |
|-------------|------------|-------------|
| Variables   | x0 ... x32 | 6–11, 14–40 |
| Relations   | Q R0 R1    | 12, 5, 4    |
| Operators   | $\wedge$ : | 1, 13       |
| Parentheses | ( )        | 2, 3        |
| Constants   | 0 1        | 41, 42      |

**Sampling Balanced Query Pairs from  $\mu$**  We exploit the the phase transition phenomenon to define a parametric family of query pairs  $\mu(m_1, m_2)$  such that sampling  $(p, q)$  from  $\mu(m_1, m_2)$  with  $m_1 \geq m_2$  guarantees the following:

- $p$  has  $m_1$  conjunctions and  $q$  has  $m_2$  conjunctions.
- The probability that  $p \subset q$  is approximately 0.5.
- The process for generating positive and negative examples is the same.

Intuitively, for a conjunctive query  $p$  with a fixed number of conjunctions, the fewer variables it uses, the more “constrained” it is. For example, let  $p(x_1) = R_1(x_1, x_2, x_3)$  and  $q(x_1) = R_1(x_1, x_1, x_2)$ . While every tuple in  $R_1$  will satisfy  $p$ , only tuples whose first and second element are the same will satisfy  $q$ .

Given a fixed set of relations  $R$ , we define the distribution  $G(X, m)$  over conjunctive queries with  $m$  conjunctions, where  $X$  is a set of variables as follows: first, choose  $m$  relations from  $R$  uniformly and with repetitions; then, conjunction variables for each conjunction uniformly and with repetitions from  $X$ . The *constraintness* of  $G(X, m)$  is defined as  $\alpha = \frac{m}{n}$ .

Let  $p \sim G(X_1, m_1)$  and  $q \sim G(X_2, m_2)$  be a query pair, and let  $\alpha_1$  and  $\alpha_2$  be the respective constraintness. We observe that the probability of  $p \subseteq q$  depends on the ratio of  $\alpha_2$  and  $\alpha_1$ . When  $\frac{\alpha_2}{\alpha_1} \gg c$  for a constant  $c$ , with high probability  $p \subseteq q$ , when  $\frac{\alpha_2}{\alpha_1} \ll c$  with high probability  $p \not\subseteq q$ , and when  $\frac{\alpha_2}{\alpha_1} \approx c$ , the probability of  $p \subseteq q$  is approximately 0.5. We empirically determined that for  $m_1 \geq m_2$ ,  $c \approx \frac{2}{15}$ .

Finally, we define the distribution  $\mu(m_1, m_2)$  over pairs of conjunctive queries  $(p, q)$  as sampling  $p \sim G(X_1, m_1)$  and  $q \sim G(X_2, m_2)$  with  $X_1$  and  $X_2$  such that  $\frac{\alpha_2}{\alpha_1} \approx c$ . Since positive and negative samples are generated with the same

structure and the same constraintness, syntactic features alone are unlikely to help classification.

## Data Augmentation for Conjunctive Query Pairs

Given a query  $q$ , we define the following rewrites:

- **MergeVar** ( $q$ ): Pick two variables  $x, y \in vars(q)$ , replace every occurrence of  $y$  by  $x$ .
- **SplitVar** ( $q$ ): Pick a new variable  $w \notin vars(q)$ , and a variable  $x \in vars(q)$ . Each occurrence of  $x$  is unchanged with probability 0.5 or replaced with  $w$ .
- **AddConj** ( $q$ ): Pick a conjunction  $R(\ell_1, \ell_2, \ell_3)$  and add it to  $q$ .
- **DelConj** ( $q$ ): Pick a conjunction in  $p$  and remove it.
- **Shuffle** ( $q$ ): Shuffle the order of conjunctions in  $p$ .

For  $(p, q)$  where  $p \subseteq q$ , we use the following set of class-preserving rewrites:  $(MergeVar(p), q)$ ,  $(p, SplitVar(q))$ ,  $(AddConj(p), q)$ ,  $(p, DelConj(q))$ ,  $(Shuffle(p), q)$ , and  $(p, Shuffle(q))$ . For  $(p, q)$  where  $p \not\subseteq q$ , we use the following class-preserving rewrites:  $(p, MergeVar(q))$ ,  $(SplitVar(p), q)$ ,  $(p, AddConj(q))$ ,  $(Shuffle(p), q)$ , and  $(p, Shuffle(q))$ .
